# Supplementary material for: Sensitivity and dose dependency of radiation-induced injury in hematopoietic stem/progenitor cells in mice
Source: PubMed Central journal article supplement — Sci Rep. 2015 Jan 27;5:8055. doi: 10.1038/srep08055 (PMC4306913; doi:10.1038/srep08055), 2015-01-27
Supplement: srep08055-s1.pdf [file srep08055-s1.pdf]

## Sensitivity and dose dependency of radiation-induced injury in hematopoietic stem/progenitor cells in mice

Chang-Ying Guo, Lan Luo, Yoshishige Urata, Shinji Goto, Wen-Jing Huang, Syu Takamura, Fumiko Hayashi, Hanako Doi, Yuriko Kitajima, Yusuke Ono, Tomoo Ogi, Tao-Sheng Li

**Supplementary Figure 1.** Body weight of mice soon (left) or 3 months (right) after daily radiation exposures to 2, 10, 50, and 250 mGy  $\gamma$ -ray.

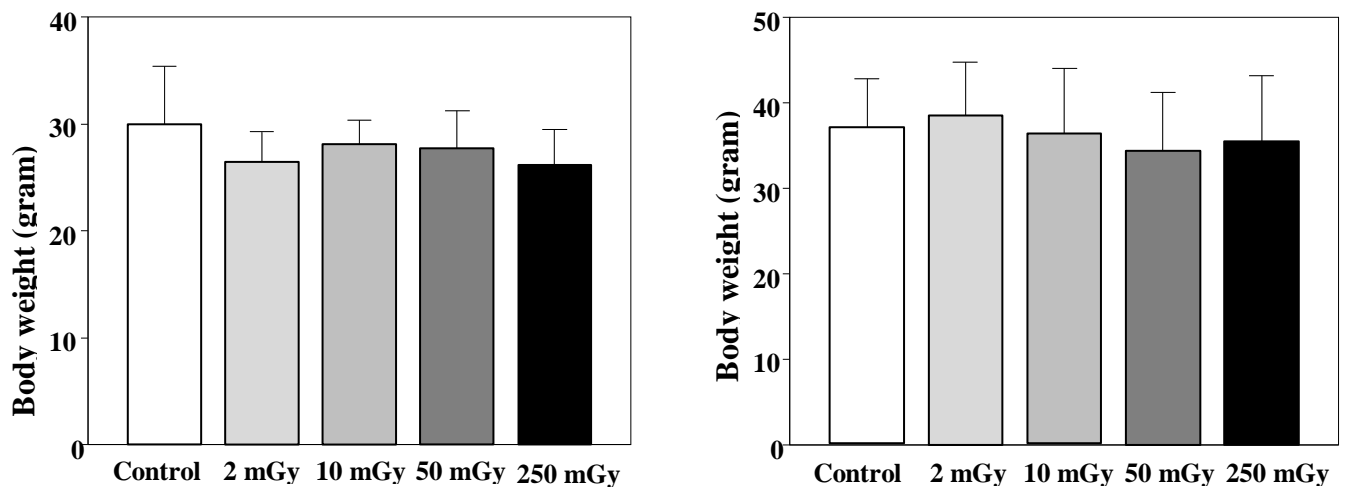

**Supplementary Table 1.** The changes of gene expression in c-kit<sup>+</sup> hematopoietic stem/progenitor cells at the acute and chronic phases after exposures to different dose of  $\gamma$  ray (compare to age-matched health mice).

| Gene Symbol   | <i>Acute Phase</i> |         |         |         | <i>Chronic Phase</i> |         |         |         |
|---------------|--------------------|---------|---------|---------|----------------------|---------|---------|---------|
|               | 2 mGy              | 10 mGy  | 50 mGy  | 250 mGy | 2 mGy                | 10 mGy  | 50 mGy  | 250 mGy |
| 9430015G10Rik | -1.0263            | -1.1423 | -1.525  | 1.6691  | 1.3134               | 1.2687  | 1.8532  | 1.5801  |
| Aass          | 1.1995             | 1.9562  | -1.1477 | 2.0981  | -1.0792              | 1.5801  | 1.2924  | 1.8532  |
| Abcb1a        | 1.1995             | 1.9562  | -1.1477 | 2.0981  | -1.0792              | 1.5801  | 1.2924  | 1.8532  |
| Abcb1b        | 3.1656             | 1.9027  | -1.1718 | 2.0408  | -1.0792              | 1.5801  | 1.2924  | 1.8532  |
| Abcb4         | 1.2418             | 1.0778  | 1.0433  | 1.4836  | 1.5692               | -1.1408 | 2.3134  | 2.5315  |
| Abcc1         | -1.3172            | 1.0853  | -1.1477 | 1.1166  | 1.4743               | 1.2226  | 1.0792  | 2.0849  |
| Abcc2         | 1.4167             | 1.7388  | -1.1241 | 1.8649  | 1.181                | 1.5801  | 1.2924  | 1.8532  |
| Abcc3         | 1.1995             | 1.9562  | -1.1477 | 2.0981  | -1.0792              | 1.5801  | 1.2924  | 1.8532  |
| Abl1          | 1.1587             | -1.0295 | -1.1965 | 2.0693  | 2.395                | 2.8284  | 2.4967  | 6.0629  |
| Acaa1a        | 1.3218             | 2.0393  | -1.1638 | 2.5125  | 2.8481               | 2.7895  | 2.7511  | 3.4343  |
| Acaa2         | 1.7441             | -1.2414 | 1.3298  | -1.4053 | -1.0792              | 1.5801  | 3.5064  | 2.2038  |
| Acaca         | -1.1872            | 1.1236  | 1.5065  | 2.8072  | -1.1173              | 1.5263  | 1.2483  | 1.7901  |
| Acad11        | 1.3971             | 2.1259  | 1.1105  | 1.3187  | -1.0792              | 1.5801  | 1.2924  | 1.8532  |
| Acad9         | 1.2079             | 1.3642  | -1.4327 | -1.1574 | 1.5369               | 1.9185  | 2.4794  | 2.3784  |
| Acadl         | 1.5938             | -1.1188 | 1.3863  | -1.3481 | -1.3013              | -2.9282 | -1.3104 | 1.057   |
| Acadm         | 1.1587             | 1.0778  | -1.0416 | -2.0862 | 2.0279               | 2.9897  | 1.4743  | 2.5491  |
| Acads         | 1.183              | 2.3103  | -1.1638 | 3.4801  | -1.0792              | 1.5801  | 1.2924  | 1.8532  |
| Acadsb        | 1.0962             | 1.5455  | -4.5277 | -1.1736 | -1.0792              | 1.5801  | 1.2924  | 1.8532  |
| Acadvl        | 1.2679             | -2.1464 | 1.0148  | -1.3388 | 1.5157               | 1.5801  | 2.042   | -1.3104 |
| Acat1         | 1.4768             | -1.0511 | 1.1028  | 1.3652  | -1.5369              | 1.2924  | -1.6702 | -2.6208 |
| Acat2         | 1.2768             | -1.2158 | -1.6344 | -9.5857 | 1.4845               | 1.5801  | 1.2924  | 1.8532  |
| Acly          | 1.0017             | 1.2295  | 1.0148  | 1.0637  | -6.021               | -1.7171 | -2.4116 | -1.5583 |
| Aco1          | 4.5709             | 1.9562  | 3.2971  | 3.7298  | -1.0792              | 1.5801  | 1.2924  | 1.8532  |
| Aco2          | 1.1995             | -1.5177 | 1.029   | -1.7063 | 1.2058               | -1.0353 | 1.0425  | -1.3947 |
| Acot12        | 1.1995             | 1.9562  | -1.1477 | 2.0981  | -1.0792              | 1.5801  | 1.2924  | 1.8532  |
| Acot2         | 1.1995             | 1.9562  | -1.1477 | 2.0981  | -1.0792              | 1.5801  | 1.2924  | 1.8532  |
| Acot3         | 5.6666             | 3.8586  | 2.7534  | 6.3604  | 1.1487               | 2.1435  | 1.6472  | 2.9897  |
| Acot6         | 2.2855             | 2.5457  | 2.058   | 2.0981  | 1.181                | 1.5801  | 1.2924  | 1.8532  |
| Acot7         | -1.4216            | -1.2414 | -1.2301 | -2.4131 | -1.4948              | 1.1408  | 2.1886  | 1.3379  |
| Acot8         | -1.6673            | -1.3213 | -1.3839 | -1.2753 | -1.0792              | 1.5801  | 1.2924  | 1.8532  |

|                 |         |         |         |         |
|-----------------|---------|---------|---------|---------|
| <b>Acot9</b>    | 1.7082  | 1.2729  | 1.182   | -1.0216 |
| <b>Acox1</b>    | -3.3346 | -3.7371 | -2.2955 | -2.0012 |
| <b>Acox2</b>    | 1.1995  | 1.9562  | -1.1477 | 2.0981  |
| <b>Acox3</b>    | 2.0885  | 1.9562  | 1.5814  | 2.8463  |
| <b>Adh1</b>     | 1.1995  | 1.9562  | -1.1477 | 2.0981  |
| <b>Adk</b>      | 1.4464  | -1.1826 | 1.4056  | -1.0359 |
| <b>Ahr</b>      | 2.853   | -1.1582 | 1.5275  | -1.0799 |
| <b>Ahsg</b>     | 2.3174  | 3.29    | 1.4352  | 4.1385  |
| <b>Akt1</b>     | -1.4118 | -1.3774 | -1.4936 | 1.0637  |
| <b>Alb</b>      | 1.1995  | 1.9562  | -1.1477 | 2.0981  |
| <b>Aldh1a1</b>  | 1.2333  | 1.0411  | 1.1105  | 1.1885  |
| <b>Aldh2</b>    | -2.1547 | 2.0112  | 2.4473  | 1.6235  |
| <b>Amfr</b>     | 1.3684  | 1.7268  | 1.1182  | 1.2389  |
| <b>Apaf1</b>    | 1.0443  | 1.3929  | -1.3744 | 1.2738  |
| <b>Apex1</b>    | 1.1995  | 1.3361  | -1.1638 | -1.8933 |
| <b>Apoa5</b>    | 1.1995  | 1.9562  | -1.1477 | 2.0981  |
| <b>Apoe</b>     | -1.8245 | -1.6609 | -1.6688 | 2.0981  |
| <b>Apof</b>     | 1.1995  | 1.9562  | -1.1477 | 2.0981  |
| <b>Aqp4</b>     | 1.1995  | 1.9562  | -1.1477 | 2.0981  |
| <b>Asah1</b>    | -1.6558 | -1.0224 | -1.6119 | -1.118  |
| <b>Asns</b>     | 1.65    | -1.6154 | -1.2048 | 1.0861  |
| <b>Atf4</b>     | -1.1872 | -1.3966 | -1.1638 | -3.5823 |
| <b>Atf6</b>     | 1.9086  | 3.1779  | 2.1753  | -2.0152 |
| <b>Atm</b>      | 1.2505  | 2.7665  | 2.0156  | 2.0981  |
| <b>Atp6v1g2</b> | 4.0069  | 1.7148  | 1.1338  | 7.0573  |
| <b>Atp8b1</b>   | -1.0774 | 1.0778  | -2.0832 | 1.156   |
| <b>Bad</b>      | 1.1348  | -1.1663 | -1.6458 | -1.1899 |
| <b>Bak1</b>     | 1.6273  | 2.3103  | 1.0801  | 1.7161  |
| <b>Bax</b>      | 1.1749  | 1.1632  | -1.101  | 1.7889  |
| <b>Bcl2</b>     | 1.1587  | -1.3121 | -1.1718 | -3.533  |
| <b>Bcl2l1</b>   | 2.0174  | 1.7388  | 1.5814  | 2.5831  |
| <b>Bcl2l11</b>  | 2.1324  | -1.1423 | 1.2668  | -3.3657 |
| <b>Bid</b>      | 1.5289  | 1.5889  | -1.4427 | -1.3574 |
| <b>Birc3</b>    | 1.8823  | 1.4123  | 1.2934  | -1.3481 |
| <b>Bmf</b>      | 1.7684  | 1.9293  | 1.5705  | 3.5043  |
| <b>Brcal</b>    | 1.2946  | 1.5032  | -1.504  | -1.3764 |

|         |         |         |         |
|---------|---------|---------|---------|
| 1.8661  | 1.4743  | 1.2058  | 1.9862  |
| 1.0867  | 1.5911  | 1.2924  | -1.181  |
| -1.0792 | 1.5801  | 1.2924  | 1.8532  |
| -1.0792 | 1.5801  | 1.2924  | 1.8532  |
| -1.0792 | 1.5801  | 1.2924  | 1.8532  |
| -1.057  | -1.3851 | -1.2924 | -1.0353 |
| -1.014  | 1.5801  | 1.2924  | 1.8532  |
| 1.021   | 1.5801  | 1.4044  | 4.0278  |
| -1.5583 | -1.6021 | 1.3379  | 1.3287  |
| -1.0792 | 1.5801  | 1.2924  | 1.8532  |
| 1.057   | -1.0792 | -1.3195 | 1.1487  |
| 1.257   | 1.5801  | 1.2924  | 2.0994  |
| 3.1821  | 3.0951  | 1.4439  | 2.1287  |
| -1.1019 | 1.1975  | 1.5801  | 1.2746  |
| 1.5801  | 1.5801  | 2.114   | 3.7842  |
| -1.0792 | 1.5801  | 1.2924  | 1.8532  |
| 1.6586  | -1.6245 | -1.4044 | -1.1173 |
| -1.0792 | 1.5801  | 1.2924  | 1.8532  |
| -1.0792 | 1.5801  | 1.2924  | 1.8532  |
| 1.021   | 1.0425  | 1.8532  | 1.2226  |
| -1.1329 | -1.5263 | -1.4845 | -1.3379 |
| -1.021  | -1.9725 | -3.0951 | -1.5476 |
| -1.4142 | 1.2058  | -1.014  | 1.4142  |
| -1.0792 | 1.5801  | 1.2924  | 1.8532  |
| -1.0792 | 1.5801  | 1.2924  | 1.8532  |
| -1.0792 | 1.5801  | 1.2924  | 1.8532  |
| -2.362  | -1.1892 | 1.0497  | 1.3851  |
| 4.2871  | 6.9644  | 4.0558  | 5.3517  |
| -3.4581 | -2.0279 | -2.4794 | -1.7291 |
| 3.605   | 1.9725  | -1.7171 | 1.4439  |
| 1.1975  | -1.6586 | 1       | -1.4142 |
| 1.2058  | 1.3379  | 1.9588  | 2.9079  |
| -1.9185 | -1.1251 | -1.3755 | 1.0425  |
| 2.4794  | 4       | 5.0281  | 5.7358  |
| -1.8921 | -2.8879 | -3.1821 | -1.2483 |

|               |         |         |         |         |
|---------------|---------|---------|---------|---------|
| <b>Brca2</b>  | 1.0299  | 1.5889  | 1.3206  | 1.1967  |
| <b>C3</b>     | -1.0479 | 2.0535  | -1.0272 | 1.164   |
| <b>C9</b>     | 1.1995  | 1.9562  | -1.1477 | 2.0981  |
| <b>Casp1</b>  | 1.2505  | 1.4723  | -1.0202 | -1.0724 |
| <b>Casp2</b>  | 1.1995  | 1.4221  | 1.0008  | 1.1012  |
| <b>Casp3</b>  | 1.4364  | 1.0267  | 1.0148  | 1.5901  |
| <b>Casp7</b>  | 1.5719  | 1.7509  | 1.3484  | 2.0981  |
| <b>Casp8</b>  | 1.5502  | 2.2627  | 1.0008  | -1.095  |
| <b>Casp9</b>  | -1.4515 | 1.4621  | -1.1965 | 1.2916  |
| <b>Cat</b>    | -1.1    | 1.0778  | -1.9572 | -1.0006 |
| <b>Cd19</b>   | 1.1995  | 1.1876  | 2.8703  | 6.4492  |
| <b>Cd36</b>   | -3.5739 | -2.0877 | 2.1904  | 1.1244  |
| <b>Cd4</b>    | 1.1995  | 1.9562  | -1.1477 | 2.0981  |
| <b>Cd40</b>   | 1.1995  | 1.9562  | -1.1477 | 2.0981  |
| <b>Cd40lg</b> | 1.1995  | 1.9562  | -1.1477 | 2.0981  |
| <b>Cd44</b>   | 1.2679  | 1.4929  | -1.3276 | -1.2405 |
| <b>Cd80</b>   | -1.2205 | 1.5137  | 1.0433  | 2.7685  |
| <b>Cd86</b>   | -2.6713 | 1.9427  | -1.3276 | -1.9197 |
| <b>Cd8a</b>   | 1.1995  | 1.9562  | -1.1477 | 2.0981  |
| <b>Cdkn1a</b> | -1.902  | -2.1464 | -2.5647 | -1.5378 |
| <b>Ces2c</b>  | 1.1995  | 1.9562  | -1.1477 | 2.0981  |
| <b>Cflar</b>  | -1.0849 | 1.578   | -1.0635 | 1.2826  |
| <b>Chk1</b>   | 1.0662  | -1.3213 | 1.1417  | 1.0204  |
| <b>Chk2</b>   | 1.6964  | 2.0112  | 2.1305  | 1.985   |
| <b>Commd4</b> | -1.2462 | 1.1392  | -1.4527 | -1.465  |
| <b>Comt</b>   | 1.2946  | 1.0629  | 1.2756  | 1.5359  |
| <b>Cox6b1</b> | 1.4265  | -1.0882 | -1.1398 | -1.2066 |
| <b>Cox7a2</b> | 1.1995  | 1.9562  | -1.1477 | 2.0981  |
| <b>Cox8a</b>  | 1.1115  | -1.0511 | -1.1638 | 1.0786  |
| <b>Cpt1a</b>  | 1.4464  | 1.2641  | 1.1182  | 1.0936  |
| <b>Cpt1b</b>  | -1.1388 | 1.1959  | -3.9416 | -2.0012 |
| <b>Cpt2</b>   | 1.1038  | 1.5671  | -1.8516 | -2.7912 |
| <b>Crat</b>   | 1.6386  | -1.1423 | 1.3298  | -2.0292 |
| <b>Crot</b>   | -1.2121 | 1.4026  | 1.2845  | 1.1967  |
| <b>Cryaa</b>  | 1.1995  | 1.9562  | -1.1477 | 2.0981  |
| <b>Cryab</b>  | 1.1995  | 1.9562  | -1.1477 | 2.0981  |

|         |         |         |         |
|---------|---------|---------|---------|
| 1.014   | -1.1567 | -1.2834 | 1.9053  |
| -1.7777 | -1.1892 | -1.1487 | 1.3472  |
| -1.0792 | 1.5801  | 1.2924  | 1.8532  |
| -1.5052 | -1.3566 | -1.021  | 1.6133  |
| -1.0425 | 1.3013  | 1.4743  | 2.2658  |
| 1.3851  | -1      | 1.3104  | 2.1435  |
| 2.5491  | 2.7132  | 2.639   | 1.7901  |
| 1.1647  | 1.1329  | -4.4076 | -1.4241 |
| 1.9185  | 1.007   | -1.2142 | 1.181   |
| 1.0644  | -1.0281 | 2.2658  | 1.4948  |
| -1.0792 | 1.5801  | 1.2924  | 1.8532  |
| -1.0792 | 1.5801  | 1.3566  | 1.8532  |
| -1.0792 | 1.5801  | 1.2924  | 1.8532  |
| -1.0792 | 1.5801  | 1.2924  | 1.8532  |
| -1.0792 | 1.5801  | 1.2924  | 1.8532  |
| -1.3104 | -1.0718 | -1.3013 | -1.021  |
| -1.0792 | 1.5801  | 1.2924  | 1.8532  |
| -1.0792 | 1.5801  | 1.2924  | 1.8532  |
| -1.0792 | 1.5801  | 1.2924  | 1.8532  |
| -1.8532 | -1.366  | -1.7171 | -1.5263 |
| -1.0792 | 1.5801  | 1.2924  | 1.8532  |
| -1.4641 | -3.4343 | -3.3636 | -1.5692 |
| -2.0994 | 1.5052  | -2.1585 | -1.5052 |
| 1.0281  | 1.5801  | 1.2924  | 1.8532  |
| 2.0279  | 1.3755  | 3.2716  | 2.2191  |
| -1.1892 | 1.2397  | -1.8404 | -1.3013 |
| 1.0497  | 1.3379  | 1.5583  | -1.3104 |
| -1.0792 | 1.5801  | 1.2924  | 1.8532  |
| 1.057   | -1.1487 | 1.0353  | -1.2397 |
| -1.2834 | -2      | 1.9053  | 1.0943  |
| 1.6021  | 1.5801  | 1.2924  | 2.1435  |
| 1.3566  | 1.1329  | -1.0792 | 1.3287  |
| -1.0792 | 1.5801  | 1.2924  | 1.8532  |
| -1.4845 | -1.3287 | -1.6021 | -1.2397 |
| -1.0792 | 1.5801  | 1.2924  | 1.8532  |
| -1.0792 | 1.5801  | 1.2924  | 1.8532  |

|         |         |         |         |         |
|---------|---------|---------|---------|---------|
| Cs      | 1.1995  | 1.9562  | -1.0344 | 2.0981  |
| Csf2    | 6.8328  | 3.2672  | 3.9483  | 20.5222 |
| Ctsb    | -2.1251 | -1.0732 | 1.0078  | 1.6462  |
| Ctse    | 1.6615  | -1.9888 | 1.0801  | -2.0575 |
| Cyc1    | 1.3402  | 1.0196  | 1.0952  | 1.4632  |
| Cyld    | 2.1924  | 2.1112  | 1.029   | 4.1385  |
| Cyp1a1  | 1.183   | 1.9293  | -1.1638 | 2.0693  |
| Cyp1a2  | 2.3497  | 1.9562  | 1.1497  | 8.1067  |
| Cyp2d22 | 2.0034  | 1.9562  | -1.1477 | 2.0981  |
| Cyp2e1  | 1.1995  | 1.9562  | -1.1477 | 2.0981  |
| Cyp3a11 | 2.0314  | 1.9562  | 1.7186  | 2.6742  |
| Cyp4a14 | 1.1995  | 1.9562  | -1.1477 | 2.0981  |
| Cyp7a1  | 1.1995  | 1.9562  | -1.1477 | 2.0981  |
| Cyp7b1  | 1.1995  | 1.9562  | -1.1477 | 2.0981  |
| Ddit3   | 1.183   | -1.6609 | -1.3839 | -1.8162 |
| Defb1   | 1.1995  | 1.9562  | -1.1477 | 2.0981  |
| Derl1   | -1.3081 | -1.3584 | -1.2913 | 1.3371  |
| Dher24  | -2.3416 | -1.4359 | -1.9302 | -1.3388 |
| Dlat    | 1.3218  | -1.0295 | 1.4056  | -2.1153 |
| Dld     | 1.3875  | -1.0958 | -1.3276 | -4.6942 |
| Dlst    | 1.1587  | 1.5562  | -1.9983 | -1.0076 |
| Dnaja1  | 1.3684  | 1.3177  | 1.0653  | 1.0637  |
| Dnaja2  | 1.1038  | 1.1632  | -1.0416 | -1.0577 |
| Dnaja3  | 1.3218  | 1.3177  | -1.5678 | 1.0346  |
| Dnajib1 | 1.1507  | -1.2941 | -1.3744 | -1.5811 |
| Dnajib6 | 1.1427  | 1.0556  | -1.5463 | -1.6712 |
| Dnajc3  | 1.561   | 1.452   | 1.2494  | -1.0146 |
| Dnajc5  | 1.0443  | -2.0306 | -1.0934 | 1.0637  |
| Dnajc6  | -1.5131 | -2.0027 | -1.8645 | -1.4958 |
| Dnm1    | 2.5535  | 1.9562  | 1.2322  | 2.6374  |
| Dpysl4  | 1.1995  | 1.9562  | -1.0061 | 2.0981  |
| Duox1   | 1.1995  | 1.9562  | -1.1477 | 2.0981  |
| Duox2   | 1.1995  | 1.9562  | -1.1477 | 2.0981  |
| Echs1   | 1.037   | -1.1111 | -1.1965 | -1.2491 |
| Edem1   | 1.2768  | 1.9698  | 1.0148  | 1.3464  |
| Edem3   | -1.1467 | 1.0196  | 1.0219  | 1.4632  |

|         |         |         |         |
|---------|---------|---------|---------|
| -1.0792 | 1.5801  | 1.2924  | 1.8532  |
| 8       | 3.2944  | 3.7064  | 4.7568  |
| 1.1487  | 1.6702  | 1.7532  | 1.257   |
| 1.7053  | 1.366   | -1.5692 | 1.1728  |
| 1.1567  | -1.0718 | 1.1173  | -1.1975 |
| 5.5022  | 7.4643  | 4.8568  | 15.0324 |
| -1.0792 | 1.5801  | 1.2924  | 1.8532  |
| 1.7532  | 3.1821  | 2.114   | 2.5315  |
| -1.0792 | 1.5801  | 1.2924  | 1.8532  |
| -1.0792 | 1.5801  | 1.2924  | 1.8532  |
| -1.0792 | 1.5801  | 1.2924  | 1.8532  |
| -1.0792 | 1.5801  | 1.2924  | 1.8532  |
| -1.0792 | 1.5801  | 1.2924  | 1.8532  |
| 1.0867  | 1.5476  | -2.0849 | -1.5052 |
| -1.0792 | 1.5801  | 1.2924  | 1.8532  |
| -1.0792 | 1.5801  | 1.2924  | 1.8532  |
| -1.0792 | 1.5801  | 1.2924  | 1.8532  |
| -4.1699 | -1.7171 | -1.6586 | -2.0849 |
| 1.257   | 1.366   | 1.1975  | -1.5583 |
| -1.6133 | -1.1251 | 1.1567  | -1.1647 |
| -1.1647 | -1.4845 | 1.366   | 1.7901  |
| -1.014  | -1.6245 | -2.114  | -1.181  |
| 1.3104  | 1.8661  | -1.1329 | 2.2974  |
| -2.1735 | -2.395  | -2.9282 | -2.042  |
| 1.257   | 1.2746  | 1.3947  | 2.4794  |
| 2.1585  | 1.8921  | 1.7777  | 3.0951  |
| 2.2501  | 1.2311  | 1.8025  | 1.366   |
| 1.3566  | 1.7654  | 2.4284  | 1.6586  |
| -1.0792 | 1.5801  | 1.2924  | 1.8532  |
| -1.0792 | 1.5801  | 1.5157  | 1.8532  |
| -1.0792 | 1.5801  | 1.2924  | 1.8532  |
| -1.0792 | 1.5801  | 1.2924  | 1.8532  |
| 1.0353  | -1.257  | 1.4948  | 2.4623  |
| -1.4044 | 1.3195  | 1.7901  | 1.5801  |
| -1.007  | -1.6702 | -1.4948 | 2.2501  |

|                |         |         |         |         |
|----------------|---------|---------|---------|---------|
| <b>Ehhadh</b>  | 4.3244  | 1.8765  | -1.1882 | 2.0127  |
| <b>Eif2ak3</b> | 1.5395  | 1.3269  | 1.2494  | 1.0133  |
| <b>Eif5b</b>   | 1.9487  | 2.0252  | 1.7426  | 1.7161  |
| <b>Eno1</b>    | -2.0244 | -1.2851 | -1.5144 | -1.4854 |
| <b>Ep300</b>   | -4.077  | -1.3584 | -1.6119 | -1.9465 |
| <b>Ephx1</b>   | 1.1995  | 3.4297  | -1.1477 | 3.0506  |
| <b>Epx</b>     | 2.4158  | 2.0678  | -1.473  | -1.7422 |
| <b>Ercc1</b>   | -1.0625 | -1.9888 | -1.6344 | -2.4809 |
| <b>Ercc2</b>   | 1.4768  | 1.1876  | 1.5275  | 1.6576  |
| <b>Ercc3</b>   | 1.3779  | -1.0153 | 2.6967  | 2.328   |
| <b>Ercc5</b>   | 2.7943  | 1.4123  | -1.0061 | 1.2304  |
| <b>Ercc6</b>   | 1.4167  | -1.1908 | -1.0783 | -1.6031 |
| <b>Ern2</b>    | 1.7562  | 1.9562  | 1.8166  | 2.4608  |
| <b>Erol1</b>   | -1.0335 | 1.0703  | -1.101  | 1.3279  |
| <b>Erol1b</b>  | 1.1667  | 1.1236  | -1.3555 | 1.2051  |
| <b>Esd</b>     | 1.3589  | -1.1582 | 1.3577  | -1.3669 |
| <b>Esr1</b>    | 1.7684  | 2.9041  | 1.6716  | -1.1026 |
| <b>F2</b>      | 1.4464  | 1.9562  | 1.9605  | 2.0981  |
| <b>Fabp1</b>   | 1.1995  | 1.9562  | -1.1477 | 2.0981  |
| <b>Fadd</b>    | -1.1547 | 1.8765  | -1.2048 | 1.6348  |
| <b>Fas</b>     | -1.5994 | 1.5032  | -1.1965 | 1.4734  |
| <b>Fasl</b>    | 1.1995  | 1.9562  | -1.1477 | 2.0981  |
| <b>Fasn</b>    | 1.1995  | 1.3737  | 1.1338  | 1.3558  |
| <b>Fbxo6</b>   | 1.7082  | 1.3177  | -1.0488 | -2.6775 |
| <b>Fh1</b>     | 1.65    | 1.3269  | 1.126   | -1.1258 |
| <b>Fmo2</b>    | 1.1995  | 1.9562  | -1.1477 | 2.0981  |
| <b>Fmo3</b>    | 3.8171  | 1.9562  | 1.4154  | 2.0981  |
| <b>Fmo4</b>    | 1.037   | -1.2414 | -2.0977 | 4.1099  |
| <b>Fmo5</b>    | 1.3127  | 1.4723  | -1.3461 | 1.5148  |
| <b>Foxi1</b>   | 1.1995  | 1.9562  | -1.1477 | 2.0981  |
| <b>Fxc1</b>    | -1.0263 | -1.8301 | -1.3555 | -3.2063 |
| <b>Gadd45a</b> | -1.0774 | -1.4559 | -1.4427 | -2.1153 |
| <b>Galnt5</b>  | 1.1995  | 1.9562  | -1.1477 | 2.0981  |
| <b>Gcdh</b>    | 2.2076  | 1.1713  | 1.0952  | 3.0932  |
| <b>Gpd1</b>    | 1.5183  | 1.3642  | 2.4644  | 5.537   |
| <b>Gpt</b>     | 2.2076  | 1.0339  | -1.2913 | 1.148   |

|         |         |         |         |
|---------|---------|---------|---------|
| -1.0792 | 1.5801  | 1.2924  | 1.8532  |
| 2.4967  | 3.8371  | 5.6962  | 3.2716  |
| -1.9588 | -3.0738 | -1.2311 | -1.7532 |
| -1.4743 | -1.3379 | -2.1435 | -1.7654 |
| -1.1728 | 1.454   | 1.1892  | 1.7053  |
| -1.0792 | 1.5801  | 1.2924  | 1.8532  |
| -1.0792 | 1.5801  | 2.7321  | 1.8532  |
| -1.0792 | 1.5801  | 1.2924  | 1.8532  |
| 2.1435  | 1.7291  | 1.7777  | 1.4241  |
| -1.0792 | 1.5801  | 1.2924  | 1.8532  |
| -1.2226 | 1.5476  | 1.1487  | 1.6358  |
| 1.4948  | 2.4453  | 1.2924  | 1.8532  |
| 1.0644  | 1.5801  | 1.2924  | 1.8532  |
| -2.2191 | -2.7702 | -2.4623 | -3.1821 |
| 2.0994  | 1.6472  | 1.5263  | 2.0849  |
| -1.0867 | -1.7532 | 1.0425  | -1      |
| -1.6818 | 1.014   | -1.2058 | 1.1892  |
| -1.0792 | 1.5801  | 1.2924  | 1.8532  |
| -1.0792 | 1.5801  | 1.2924  | 1.8532  |
| 1.1408  | 1.5801  | 1.5369  | 2.0139  |
| 1.3379  | 2.514   | 2.6574  | 4.4691  |
| -1.0792 | 1.5801  | 1.2924  | 1.8532  |
| 1.2142  | 1.4641  | -1.4142 | 1.4044  |
| -2.3784 | -2      | -2.514  | -2.6208 |
| -2.9282 | -2.4116 | -1.2483 | -1.5476 |
| -1.0792 | 1.5801  | 1.2924  | 1.8532  |
| -1.0792 | 1.5801  | 1.2924  | 1.8532  |
| 1.1647  | 4       | 3.0314  | 3.6301  |
| 1.3947  | 1.2142  | 1.3566  | 2.4284  |
| -1.0792 | 1.5801  | 1.2924  | 1.8532  |
| -2.3295 | -1.6133 | -3.5308 | -1.0353 |
| -2.362  | -2.2346 | -1.8661 | -3.6301 |
| -1.0792 | 1.5801  | 1.2924  | 1.8532  |
| 2.5669  | 2.4116  | 3.0314  | 1.7901  |
| -1.0792 | 1.5801  | 1.2924  | 1.8532  |
| -1.0792 | 1.5801  | 1.2924  | 1.8532  |



|               |         |         |         |         |
|---------------|---------|---------|---------|---------|
| <b>Hspd1</b>  | 1.0228  | 1.0778  | 1.1417  | 1.5466  |
| <b>Hspe1</b>  | 1.5719  | -1.0658 | -1.0488 | -1.0006 |
| <b>Hsph1</b>  | 1.2856  | 1.3833  | 1.1182  | 2.7878  |
| <b>Htra2</b>  | 1.183   | -2.3005 | 1.1985  | 1.1244  |
| <b>Htra4</b>  | -1.0924 | 1.4929  | -1.504  | 1.6012  |
| <b>Icam1</b>  | -3.4522 | -2.1316 | -4.109  | -2.0152 |
| <b>Idh1</b>   | -1.179  | -2.8322 | 1.1338  | -1.1103 |
| <b>Idh2</b>   | 1.4167  | 1.0778  | -1.1398 | -1.6143 |
| <b>Idh3a</b>  | 1.5078  | -1.0882 | -1.4033 | 1.1401  |
| <b>Idh3b</b>  | 1.183   | 1.2641  | -1.1638 | -1.0216 |
| <b>Idh3g</b>  | 1.2592  | 1.0556  | 1.0361  | 1.0133  |
| <b>Ifng</b>   | 1.1995  | 1.9562  | 1.0361  | 2.0981  |
| <b>Il10</b>   | 1.1995  | 1.9562  | -1.1477 | 2.0981  |
| <b>Il13</b>   | 1.1995  | 2.5457  | -1.1477 | 2.0981  |
| <b>Il1a</b>   | 1.1995  | 1.9562  | 1.7547  | 2.0981  |
| <b>Il1b</b>   | -1.4315 | 1.0629  | 2.0723  | 3.2923  |
| <b>Il2</b>    | 1.1995  | 1.9562  | -1.1477 | 2.0981  |
| <b>Il2ra</b>  | 1.1995  | 1.9562  | -1.1477 | 2.0981  |
| <b>Il4</b>    | 1.3127  | 1.0928  | 1.8292  | 1.1089  |
| <b>Il5</b>    | 1.1995  | 1.9562  | -1.1477 | 2.0981  |
| <b>Il6</b>    | 1.0886  | 2.0678  | -1.2913 | -1.5062 |
| <b>Inhbe</b>  | 1.1995  | 1.9562  | -1.1477 | 2.0981  |
| <b>Irf6</b>   | 1.1995  | 1.9562  | -1.1477 | 2.0981  |
| <b>Itgax</b>  | 1.5828  | 2.5992  | -2.3437 | 3.8882  |
| <b>Jag1</b>   | 2.1622  | 2.1706  | -2.4773 | 3.6785  |
| <b>Jph3</b>   | 2.3991  | 1.9562  | 1.8547  | 5.9344  |
| <b>Kcnip1</b> | 1.1995  | 1.9562  | -1.1477 | 2.0981  |
| <b>Khk</b>    | 1.1192  | -1.0295 | -1.3184 | -2.659  |
| <b>Klf1</b>   | 2.254   | 1.9698  | 1.66    | 2.3935  |
| <b>Lig4</b>   | 2.0314  | 8.1008  | -1.1477 | 2.0981  |
| <b>Lmna</b>   | -1.1872 | -1.7075 | -1.6572 | 1.5791  |
| <b>Lpl</b>    | -1.3637 | 2.8247  | 2.4815  | 6.0591  |
| <b>Lss</b>    | 3.1005  | 4.107   | 1.4154  | 2.5476  |
| <b>Ly6d</b>   | -1.0774 | -2.2688 | -1.3649 | -1.2753 |
| <b>Lyz2</b>   | -1.85   | -1.0295 | -1.3839 | -1.5062 |
| <b>Mag</b>    | 5.3982  | 2.7284  | 1.947   | 5.8527  |

|         |         |         |         |
|---------|---------|---------|---------|
| -1.5801 | -1.2058 | -1.6021 | -1.1728 |
| -1.4142 | -1.1408 | -1.2058 | 1.1096  |
| 1.454   | 1.0867  | 1.0792  | 6.498   |
| 2.1287  | 2.5847  | 2.9282  | 2.395   |
| -1.0792 | 1.5801  | 1.2924  | 1.8532  |
| 1.1567  | 1.5801  | 1.2924  | 1.8532  |
| -2.7511 | -1.6133 | -1.815  | -1.3755 |
| -1.0867 | -1.0353 | -1.2834 | -1.0425 |
| -3.8106 | -1.9185 | -2.3784 | -2.0562 |
| -1.3104 | -1.1647 | 1.3472  | -1.4641 |
| 1.3947  | 1.7777  | 2.0562  | 1.6935  |
| -1.0792 | 1.5801  | 1.2924  | 1.8532  |
| -1.0792 | 1.5801  | 1.2924  | 1.8532  |
| -1.0792 | 1.5801  | 1.2924  | 1.8532  |
| -1.0792 | 1.5801  | 1.2924  | 1.8532  |
| -1.5263 | 1.1647  | 1.1096  | 3.3404  |
| -1.0792 | 1.5801  | 1.2924  | 1.8532  |
| -1.0792 | 1.5801  | 1.2924  | 1.8532  |
| -1.0792 | 1.5801  | 2.2974  | 1.8532  |
| -1.0792 | 1.5801  | 1.2924  | 1.8532  |
| -1.0943 | 1.5583  | 1.2746  | 1.8277  |
| -1.0792 | 1.5801  | 1.2924  | 1.8532  |
| -1.0792 | 1.5801  | 1.2924  | 1.8532  |
| -1.0792 | 1.5801  | 1.2924  | 1.8532  |
| -1.1408 | -1.021  | 1.7291  | 1.2142  |
| 1.3755  | 1.2058  | -1.014  | 1.8404  |
| -1.0792 | 1.5801  | 1.2924  | 1.8532  |
| -1.6818 | 1.4641  | 1.3104  | 1.0867  |
| -1.0792 | 1.5801  | 2.6945  | 1.8532  |
| 1.3947  | 1.5801  | 1.2924  | 1.8532  |
| -1.0792 | 1.5801  | 1.2924  | 1.8532  |
| -1.454  | -1.1487 | -1.3566 | -1.8532 |
| 1.8661  | 1.5692  | 1.3104  | 4.1989  |



|                 |         |         |         |         |
|-----------------|---------|---------|---------|---------|
| <b>Manba</b>    | -1.229  | -1.0366 | 1.1105  | -1.1817 |
| <b>Maoa</b>     | 1.1995  | 1.9698  | -1.1477 | 2.0981  |
| <b>Maob</b>     | 1.1995  | 1.9562  | -1.1477 | 2.0981  |
| <b>Mapk8</b>    | 1.1427  | -1.0882 | -1.3744 | -1.5485 |
| <b>Mbtps1</b>   | 1.2592  | 1.0556  | 1.0361  | -1.2234 |
| <b>Mbtps2</b>   | 2.2855  | 2.6723  | 4.1446  | 1.4939  |
| <b>Mcl1</b>     | -1.2037 | 1.0483  | -1.2048 | -1.0359 |
| <b>Mdh1</b>     | -1.229  | -1.0658 | -1.2216 | -1.7543 |
| <b>Mdh1b</b>    | 1.1995  | 1.9562  | -1.1477 | 2.0981  |
| <b>Mdh2</b>     | 1.2163  | -1.1908 | -1.0131 | -1.2066 |
| <b>Mdm2</b>     | 1.3127  | 1.0629  | 1.1182  | 1.1244  |
| <b>Metap2</b>   | -1.1467 | -1.4968 | -1.4527 | -1.3574 |
| <b>Mgmt</b>     | -1.5236 | -1.1266 | -1.3276 | -1.2405 |
| <b>Mki67</b>    | 1.3779  | 1.7753  | -1.0344 | -1.5062 |
| <b>Mlh1</b>     | 2.4326  | 1.916   | 1.3298  | -2.1301 |
| <b>Mlx</b>      | 1.1913  | -1.5073 | -1.3744 | -2.3309 |
| <b>Mpo</b>      | 1.2079  | 1.6912  | 1.3672  | -2.0862 |
| <b>Mrps18b</b>  | -1.1954 | -3.3448 | -1.5463 | -2.6775 |
| <b>Msh2</b>     | 1.5719  | 1.0411  | -1.2823 | -1.7063 |
| <b>Mtpp</b>     | -1.0122 | 1.6111  | -1.3936 | 1.728   |
| <b>Nfkb1</b>    | -1.2724 | -2.2531 | -1.6804 | -1.2665 |
| <b>Nploc4</b>   | 1.3036  | -1.4161 | -1.256  | 1.1012  |
| <b>Nqo1</b>     | 2.1177  | -1.3679 | -1.0561 | -2.1007 |
| <b>Nr0b2</b>    | 5.8664  | 1.9562  | -1.0488 | 2.8072  |
| <b>Nr1h4</b>    | 1.1995  | 1.9562  | -1.1477 | 2.0981  |
| <b>Nr5a2</b>    | 1.1995  | 1.9562  | -1.1477 | 2.0981  |
| <b>Nucb1</b>    | 1.7562  | 1.2381  | 1.2408  | 1.2916  |
| <b>Nudt1</b>    | 1.1348  | -1.1826 | 1.1738  | 1.0133  |
| <b>Nudt13</b>   | 1.3402  | 1.4929  | -1.1086 | -1.1258 |
| <b>Nudt15</b>   | -1.5556 | -1.9211 | -1.1882 | 1.4939  |
| <b>Nup210</b>   | 1.1587  | 1.0339  | -1.0416 | 1.3843  |
| <b>Ogdhl</b>    | 1.1995  | 1.9562  | -1.1477 | 2.0981  |
| <b>Ogg1</b>     | 1.1427  | -1.0882 | -1.525  | -1.8543 |
| <b>Olfr1404</b> | 1.1995  | 1.9562  | -1.1477 | 2.0981  |
| <b>Os9</b>      | 1.0662  | -1.1188 | -1.0131 | -1.7182 |
| <b>Osta</b>     | 2.1177  | -1.1111 | 2.0437  | 1.3558  |

|         |         |         |         |
|---------|---------|---------|---------|
| -2.4623 | -1.5801 | -1.6133 | 1.7291  |
| -1.0792 | 1.5801  | 1.2924  | 1.8532  |
| -1.0792 | 1.5801  | 1.2924  | 1.8532  |
| -1.8025 | -1.366  | -1.815  | -1.434  |
| 1.2058  | 1.5692  | -1.021  | 1.4948  |
| -1.0792 | 1.5801  | 1.2924  | 2.1735  |
| -1.2311 | -1.014  | 1.3947  | 2.0849  |
| 1.057   | 1.2142  | -1.7171 | -1.1408 |
| -1.0792 | 1.5801  | 1.2924  | 1.8532  |
| -1.2658 | -1.0718 | -1.1487 | -1.0644 |
| -2.0705 | -2.1287 | -1.6472 | -1.1096 |
| 2.4453  | 1.7777  | 1.9453  | 1.6935  |
| -1.3851 | -1.6358 | -2      | -1.3947 |
| 1.1251  | 1.3287  | 1.014   | 1.4044  |
| 1.0718  | -1.8277 | -2.2346 | -1.5583 |
| -1.257  | 1.3566  | 2.0279  | 1.5911  |
| -1.8661 | -1.2483 | -1.181  | -1.1019 |
| 3.9177  | 2.4116  | 1.057   | 1.5157  |
| -1.1019 | -2.4453 | -1.454  | -2.0849 |
| -1.0792 | 1.5801  | 1.2924  | 1.8532  |
| -2.042  | -1.4044 | -1.2226 | -1.6472 |
| 1.6021  | 1.5801  | 1.2924  | 1.8532  |
| -1.3566 | 1.257   | 1.0281  | 1.4743  |
| -1.0792 | 1.5801  | 1.2924  | 1.8532  |
| -1.0792 | 1.5801  | 1.2924  | 1.8532  |
| -1.0792 | 1.5801  | 1.2924  | 1.8532  |
| 2.114   | 1.2397  | 1.9185  | 1.2311  |
| -1.7411 | -1.021  | 1.2483  | 1.1487  |
| -1.007  | 2.3134  | 3.2944  | 1.8532  |
| -1.0792 | 1.5801  | 1.2924  | 1.8532  |
| -1.1487 | -1.879  | -1.2397 | 1.1096  |
| -1.0792 | 1.5801  | 1.2924  | 1.8532  |
| -1.0792 | 1.5801  | 1.2924  | 1.8532  |
| -1.0792 | 1.5801  | 1.2924  | 1.8532  |
| -3.2266 | 2.0562  | 1.5692  | 2.114   |
| -1.0792 | 1.5801  | 1.2924  | 1.8532  |

|          |         |         |         |         |
|----------|---------|---------|---------|---------|
| Ostb     | 2.3825  | 1.9562  | 1.7305  | 5.8527  |
| Parp1    | -1.8119 | -1.3213 | -1.9302 | -1.7422 |
| Parp2    | 1.5183  | 1.4123  | 1.2068  | 1.6348  |
| Pcca     | 1.1587  | 1.5137  | -1.2735 | 1.6576  |
| Pcna     | 1.1587  | -1.3679 | -1.1398 | -1.5378 |
| Pdyn     | 1.3036  | 1.9562  | -1.1477 | 2.0981  |
| Pfdn5    | 1.0017  | 1.1876  | -1.1319 | -1.1899 |
| Pnpla3   | 1.1995  | 1.9562  | -1.1477 | 2.0981  |
| Pon1     | 1.1995  | 1.9562  | 1.3024  | 2.0981  |
| Por      | 1.5828  | 1.1713  | -1.3368 | 1.1244  |
| Pou3f3   | 1.1995  | 1.9562  | -1.1477 | 2.0981  |
| Ppara    | 1.1995  | 1.9562  | -1.1477 | 2.0981  |
| Pparg    | 1.1348  | 1.3361  | 1.804   | 5.1662  |
| Ppia     | 1.3875  | 1.1314  | 1.0579  | -1.7422 |
| Ppp1r15b | 1.4871  | -1.1423 | 1.0078  | 1.1885  |
| Prdx1    | 2.2855  | 1.1392  | 2.7155  | 3.2246  |
| Prdx2    | 1.5395  | -2.1915 | -1.1086 | -1.6828 |
| Prdx6    | -1.3356 | -1.7678 | -1.1086 | -1.6368 |
| Prkdc    | 2.1622  | 4.5887  | 1.9069  | 2.0981  |
| Ptgs2    | 1.0962  | 1.7877  | 3.5094  | 1.9173  |
| Ptprc    | -1.3172 | -1.0013 | -1.1965 | -2.2205 |
| Pvr      | 1.2856  | 1.9562  | -1.1477 | 2.0981  |
| Rab25    | 1.1995  | 1.9562  | -1.1477 | 2.0981  |
| Rad51    | 1.3684  | 1.2126  | -1.3368 | -1.7665 |
| Rdx      | 1.8435  | 1.763   | 1.1497  | 1.0063  |
| Retn     | 2.775   | 1.9027  | 2.5513  | 19.6862 |
| S100a7a  | 1.1995  | 1.9562  | -1.1477 | 2.0981  |
| S100a8   | -1.1    | -1.0013 | 1.0219  | -1.9197 |
| Sc4mol   | 3.1005  | 6.225   | 3.9757  | 4.1099  |
| Scd1     | -1.3923 | -2.1613 | -2.9257 | -1.2149 |
| Sdha     | 1.0299  | -1.0439 | -1.2387 | -1.5485 |
| Sdhb     | -1.0407 | -1.3966 | -1.9037 | -1.5272 |
| Sdhc     | -1.1388 | 1.2906  | -1.8516 | 1.4734  |
| Sdhd     | -1.1388 | -1.0224 | -1.0131 | 1.2738  |
| Sec62    | 1.1192  | -1.0295 | 1.0148  | -1.3203 |
| Sel1l    | 2.4837  | -1.6154 | 1.1657  | 1.0418  |

|         |         |         |         |
|---------|---------|---------|---------|
| -1.0792 | 1.5801  | 1.5476  | 3.6808  |
| 1.4241  | 1.4142  | -1.3472 | 1.0867  |
| -1.0792 | 1.5801  | 1.2924  | 1.8532  |
| 2.395   | 1.5801  | 3.0525  | 2.4284  |
| -1.1019 | -1.6358 | -1.3566 | -2.3295 |
| -1.0792 | 1.5801  | 1.2924  | 1.8532  |
| -1      | -1      | -1.057  | -1.2483 |
| -1.0792 | 1.5801  | 1.2924  | 1.8532  |
| -1.0792 | 1.5801  | 1.2924  | 1.8532  |
| 1.6702  | 1.4743  | 2.1585  | 1.7291  |
| -1.0792 | 1.5801  | 1.2924  | 1.8532  |
| -1.0792 | 1.5801  | 1.2924  | 1.8532  |
| -1.1567 | 1.4743  | 1.2058  | 1.7291  |
| -1.5052 | -1.4641 | -1.014  | -1.1173 |
| -2.2974 | -2.3295 | -1.4948 | -3.1167 |
| -1.0792 | 1.5801  | 1.2924  | 1.8532  |
| 1.8277  | 1.3195  | -1.0497 | -1.1892 |
| -1.3287 | -1.6472 | -1.2924 | -1.021  |
| -1.0792 | 1.5801  | 1.2924  | 1.8532  |
| -1.0792 | 1.5801  | 1.2924  | 1.8532  |
| -1.5052 | 1.1647  | -2.969  | -1.0353 |
| -1.0792 | 1.5801  | 1.2924  | 1.8532  |
| -1.0792 | 1.5801  | 1.2924  | 1.8532  |
| -1.3104 | -1.1329 | -4.0278 | -1.2483 |
| -1.1975 | 1.0425  | 1.2746  | 1.3472  |
| 2.395   | 1.9725  | 1.2397  | 2.3134  |
| -1.0792 | 1.5801  | 1.2924  | 1.8532  |
| -1.8025 | -1.3104 | -1.1019 | -1.1019 |
| 1.6935  | 2.7321  | 1.2924  | 1.9053  |
| -1.0792 | 1.5801  | 1.2924  | 1.8532  |
| -3.2944 | 2.0279  | 1.1019  | 1.3851  |
| 1.5263  | -1.5911 | -1.454  | 1.9053  |
| 1.9453  | 3.249   | 1.7532  | 2.5847  |
| 1.3104  | 1.5801  | 1.4948  | 1.8532  |
| 1.057   | -1.007  | -2.362  | -2.2501 |
| -1.0792 | 1.5801  | 1.2924  | 1.8532  |

|           |         |         |         |         |
|-----------|---------|---------|---------|---------|
| Serp1     | 1.2247  | 1.0411  | 1.4653  | -1.0076 |
| Serpina3k | 4.3847  | 3.4776  | 3.4851  | 5.4231  |
| Serpina3n | 1.1995  | 1.9562  | -1.1477 | 2.0981  |
| Slc10a1   | 10.3566 | 9.2412  | 6.1527  | 5.8527  |
| Slc2a3    | 1.4464  | -1.1908 | -1.1319 | 1.1885  |
| Slco1a4   | 1.1995  | 1.9562  | -1.1477 | 2.0981  |
| Smpd1     | 1.1587  | -1.1582 | 1.4253  | -1.0799 |
| Sod1      | 1.2163  | -1.8428 | 1.3298  | -2.2988 |
| Spata2    | -1.6443 | 1.1632  | -1.0202 | -2.2829 |
| Srebf1    | -1.4717 | -1.9479 | -2.0832 | -2.3309 |
| Stbd1     | 1.1995  | 1.9562  | -1.1477 | 2.0981  |
| Sucla2    | 1.3684  | -1.6724 | -1.3744 | -2.3309 |
| Suc1g1    | 1.2418  | 1.703   | 1.9741  | 1.8265  |
| Suc1g2    | 1.3402  | 1.2996  | 1.1182  | 1.3464  |
| Sycp2     | 1.4974  | 1.8765  | 3.4851  | 2.0127  |
| Syt1      | 1.2679  | 1.9562  | -1.1477 | 2.0981  |
| Syvn1     | 1.5395  | 1.9027  | 1.1105  | 1.728   |
| Tagln     | 1.3402  | -2.4485 | -1.0344 | -1.2753 |
| Tcp1      | 1.3684  | 1.0126  | 1.0877  | -1.5811 |
| Tff3      | 1.1995  | 1.9562  | -1.1477 | 2.0981  |
| Tgfb1     | -1.1154 | 1.4026  | -1.2473 | -1.1258 |
| Tmem57    | -1.0849 | 1.2042  | 1.0579  | 1.6462  |
| Tnf       | 1.3036  | -1.0013 | -1.5897 | 1.0711  |
| Tnfaip81l | 3.0578  | 1.9562  | 2.8113  | 3.9425  |
| Tnfrsf10b | 1.1995  | 1.9562  | -1.1477 | 2.0981  |
| Tnfrsf1a  | -1.229  | 1.0339  | 1.0148  | 1.0491  |
| Tnfsf10   | 1.2768  | -4.4442 | -9.9782 | -3.5086 |
| Tpo       | 1.1995  | 1.9562  | -1.1477 | 2.0981  |
| Trim10    | -1.6673 | -2.5703 | -4.6874 | 1.443   |
| Trp53     | 1.5078  | -1.1502 | 1.4858  | 1.148   |
| Txnip     | 1.0736  | 1.2381  | -1.2387 | -1.96   |
| Txn14b    | 1.9352  | 3.1125  | 4.6629  | 2.4101  |
| Txnrd2    | 1.183   | 1.5889  | -1.2735 | 1.8779  |
| Ube2g2    | 1.1667  | 1.4825  | -1.0709 | -1.1026 |
| Ube2j2    | 1.0962  | 1.0411  | -1.0858 | -1.5272 |
| Ubqln2    | 3.2098  | 2.7665  | 2.6049  | 19.961  |

|         |         |         |         |
|---------|---------|---------|---------|
| -3.4343 | -3.7842 | -1.0644 | -3.249  |
| 1.9725  | 2.395   | 2.042   | 3.7321  |
| -1.0792 | 1.5801  | 1.2924  | 1.8532  |
| -1.4044 | 1.2142  | 1.0718  | 1.4241  |
| 1.2311  | -1.2834 | 1.815   | -1.5369 |
| -1.0792 | 1.5801  | 1.2924  | 1.8532  |
| -1.0792 | 1.5801  | 1.4743  | 1.8532  |
| -1.2483 | -2.7321 | -2.2346 | -3.1383 |
| -1.0792 | 1.5801  | 1.2924  | 1.8532  |
| 5.2054  | 3.249   | 2.1886  | 2.4453  |
| -1.0792 | 1.5801  | 1.2924  | 1.8532  |
| -2.0562 | -1.3195 | -1.366  | -1.879  |
| -1.8025 | -1.057  | -1.2924 | 1.1096  |
| -2.1735 | -2.114  | 1.0867  | 2.8879  |
| -1.0792 | 1.5801  | 1.2924  | 1.8532  |
| -1.0792 | 1.5801  | 1.2924  | 1.8532  |
| 2.4967  | 1.0867  | -1.1251 | 1.2746  |
| 1.2834  | 1.5801  | 1.2924  | 1.8532  |
| -1.6358 | -1      | -1.1567 | 1.1975  |
| -1.0792 | 1.5801  | 1.2924  | 1.8532  |
| -1.1567 | 1.2226  | -1.5583 | -1.3472 |
| -1.0792 | 1.5801  | 1.2924  | 1.8532  |
| -1.0792 | 1.9588  | 1.2924  | 1.8532  |
| -1.0497 | 1.6702  | 1.3472  | 2.2815  |
| -1.0792 | 1.5801  | 1.2924  | 1.8532  |
| -2.9897 | 1.5801  | 1.1487  | -1.4948 |
| -1.0792 | 1.5801  | 1.2924  | 1.8532  |
| -1.0792 | 1.5801  | 1.2924  | 1.8532  |
| 1.7171  | 1.5801  | 1.2924  | 1.8532  |
| 1.1019  | -1.014  | -1.2397 | 1.1567  |
| -1.6358 | 1.0718  | -1.2397 | -1.3195 |
| -1.0792 | 1.5801  | 1.454   | 1.8532  |
| 1.7777  | -1.0497 | 1.0718  | 2.3784  |
| 1.4044  | 2.3295  | 1.8404  | 1.7053  |
| 1.0497  | 1.021   | 1       | 1.1647  |
| 2.4967  | 2.1435  | 1.9053  | 4.0278  |

|               |         |         |         |         |
|---------------|---------|---------|---------|---------|
| <b>Ubxn4</b>  | 1.0962  | -1.1111 | 1.1182  | -1.465  |
| <b>Ucp1</b>   | 1.1995  | 1.9562  | -1.1477 | 2.0981  |
| <b>Ucp2</b>   | 1.3127  | 1.1236  | 1.0008  | -1.4854 |
| <b>Ucp3</b>   | 1.1995  | 1.9562  | -1.1477 | 2.0981  |
| <b>Ugt1a1</b> | -1.402  | 1.1632  | -1.9302 | 1.2476  |
| <b>Ugt2a1</b> | 1.1995  | 1.9562  | -1.1477 | 2.0981  |
| <b>Ugt2b1</b> | 2.5184  | 1.9562  | -1.1477 | 2.0981  |
| <b>Uox</b>    | 1.1995  | 1.9562  | -1.1477 | 2.0981  |
| <b>Vcp</b>    | 1.1348  | -1.5073 | -1.5144 | -1.5272 |
| <b>Wipi1</b>  | 1.8308  | 1.9293  | 1.8419  | 1.2304  |
| <b>Xbp1</b>   | -1.2037 | -1.1582 | -1.413  | -1.2066 |
| <b>Xiap</b>   | 1.3127  | -1.2763 | 1.6146  | 1.74    |
| <b>Xpa</b>    | -1.2991 | -1.5932 | -1.0709 | -1.4249 |
| <b>Xpc</b>    | 1.1995  | -1.3397 | -1.3002 | -1.6945 |
| <b>Xrcc1</b>  | 1.3589  | 1.4723  | -1.0061 | 1.0346  |
| <b>Xrcc5</b>  | 1.6964  | 1.9027  | 1.0506  | 2.4951  |

|         |         |         |         |
|---------|---------|---------|---------|
| -2.3134 | -1.2226 | -1.9588 | -2.3457 |
| -1.0792 | 1.5801  | 1.2924  | 1.8532  |
| -1.4845 | 1.2658  | 1.1251  | -1.4743 |
| -1.0792 | 1.5801  | 1.2924  | 1.8532  |
| -1.0792 | 1.5801  | 1.2924  | 1.8532  |
| -1.0792 | 1.5801  | 1.2924  | 1.8532  |
| 3.4822  | 1.5801  | 1.8404  | 1.8532  |
| -1.0792 | 1.5801  | 1.2924  | 1.8532  |
| -2.6027 | -1.9053 | -1.8661 | 1.0281  |
| -1.5692 | 1.2226  | 1.3755  | 1.6472  |
| -1.454  | -2.969  | -4.2281 | -2.5847 |
| -1.0792 | 1.5801  | 1.2924  | 1.8532  |
| 2.3134  | 1.5801  | 1.2924  | 3.1821  |
| -1.0792 | 1.5801  | 1.2924  | 1.8532  |
| 1.434   | 1.6818  | 1.6021  | 1.0718  |
| -2.4453 | -1.6021 | -1.8025 | -1.366  |
